# Supplementary material
Source: PubMed Central journal article supplement (PMC3237912)
Supplement: NIHMS335282-supplement-2.pdf [file NIHMS335282-supplement-2.pdf]

**A**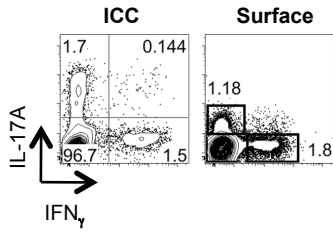**B**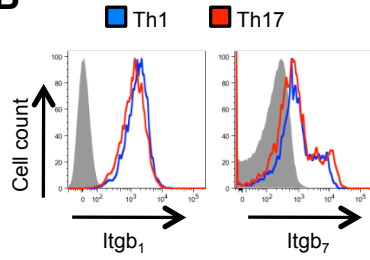**C**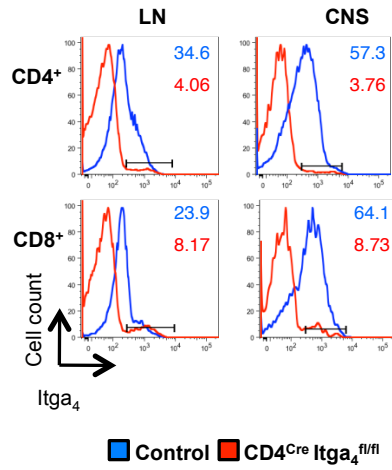**D**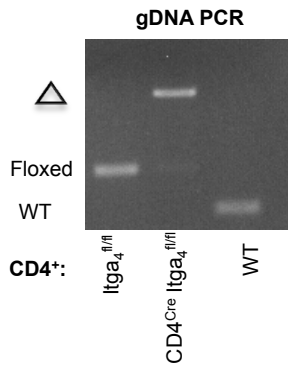**E**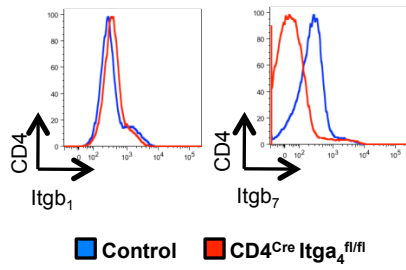**F**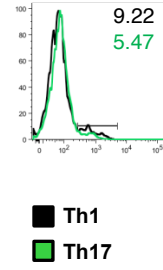**G**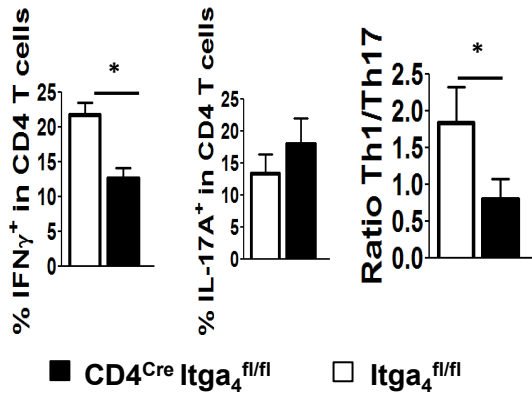

**Supplemental FIGURE 1. Characterization of Itg and cytokine expression on T cell subsets from Itga<sub>4</sub><sup>fl/fl</sup> CD4<sup>Cre</sup> and wild type mice.** (A, B) WT mice were immunized with MOG<sub>35-55</sub> in CFA. Ten days later, draining LNs (dLN) were collected and single-cell suspension prepared. Enriched CD4<sup>+</sup> T cells were stimulated with PMA and ionomycin for 3 hours and stained for IFN $\gamma$  and IL17A by intracellular (A, left) or secretion assay (A, right). (B) Itgb<sub>1</sub> (left) and Itgb<sub>7</sub> expression (right) gated on Th1 (IFN $\gamma$ <sup>+</sup>, blue line) and Th17 subsets (IL17A<sup>+</sup>, red line) stained by secretion assay. Filled histograms represent the isotype staining. Histograms are representative of three independent experiments. (C, E and F) Control and CD4<sup>Cre</sup> Itga<sub>4</sub><sup>fl/fl</sup> mice were immunized for EAE development with MOG<sub>35-55</sub>/CFA. dLN and CNS were collected 8 and 20 days after immunization respectively. Itga<sub>4</sub> expression was evaluated on CD4<sup>+</sup> (top) and CD8<sup>+</sup> T cells (bottom) from control (blue line) and CD4<sup>Cre</sup> Itga<sub>4</sub><sup>fl/fl</sup> mice (red line) in dLN (left) and CNS (right). Overlays are representative of 4 different experiments. Note equivalent deletion of Itga<sub>4</sub> on CD4<sup>+</sup> and CD8<sup>+</sup> T cells isolated from LN and CNS. (D) CD4<sup>+</sup> T cells from CD4<sup>Cre</sup> Itga<sub>4</sub><sup>fl/fl</sup>, Itga<sub>4</sub><sup>fl/fl</sup> and WT mice were isolated by MACS positive purification (overall purity of CD4<sup>+</sup> T cells: 90%) and stimulated with plate bound anti-CD3/CD28 antibodies (both at 1 $\mu$ g/ml) for 48 hours. Genomic DNA was isolated and deletion of Itga<sub>4</sub> at the genomic level was determined using previously described primers (Priestley GV. and al, Blood 2007, 109(1):109-11). Upper band detects Itga<sub>4</sub> deleted allele ( $\Delta$ ), middle band detects floxed allele (floxed) and lower band detects wild type allele (WT). (E) Itgb<sub>1</sub> (left) and Itgb<sub>7</sub> (right) expression gated on CD4<sup>+</sup> T cells from control (blue line) and CD4<sup>Cre</sup> Itga<sub>4</sub><sup>fl/fl</sup> mice (red line). (F) Itga<sub>4</sub> expression was evaluated on Th1 cells (dark line) and Th17 cells (green line) from dLN of CD4<sup>Cre</sup> Itga<sub>4</sub><sup>fl/fl</sup> mice using secretion assay. (G) CD4<sup>Cre</sup> Itga<sub>4</sub><sup>fl/fl</sup> and Itga<sub>4</sub><sup>fl/fl</sup> mice were immunized for EAE development with MOG<sub>35-55</sub> in CFA and pertussis toxin. Eight days later, CNS were collected and single cell suspensions prepared. Cells were stimulated with PMA/ionomycin and analyzed for cytokine secretion by intracellular cytokines staining. Percentages of IFN $\gamma$  and IL17A infiltrating CD4<sup>+</sup> T cells recovered from the CNS of non sick mice were determined and used to calculate the ratio of Th1/Th17 cells in the CNS of CD4<sup>Cre</sup> Itga<sub>4</sub><sup>fl/fl</sup> (dark) and Itga<sub>4</sub><sup>fl/fl</sup> mice (white)(\*p<0.01). Data representative of 2 independent experiments with 6 mice per group.
